# Supplementary material for: Broad-spectrum light-responsive N-doped graphene quantum dots for efficient photocatalytic generation of hydroxyl radicals and antibacterial applications
Source: Royal Society of Chemistry journal article supplement (doi:10.1039/d5nr03717d), 2025-01-01
Supplement: d5nr03717d3.pdf [file d5nr03717d3.pdf]

# **Broad-Spectrum Light-Responsive N-Doped Graphene Quantum Dots for Efficient Photocatalytic Generation of Hydroxyl Radicals and Antibacterial Applications**

Van-Phuoc Thai <sup>\*1</sup>, Dam Ngoc Tran<sup>1</sup>, Khanh Dung Pham<sup>2</sup>, Thanh An Nguyen-Thi<sup>2</sup>, Bao Tram Ngo-Le<sup>2</sup>, Kazumasa Takahashi<sup>3</sup>, Toru Sasaki<sup>3,4</sup>, and Takashi Kikuchi<sup>3,5,6</sup>

<sup>1</sup> Faculty of Mechanical Engineering, HCMC University of Technology and Education, Ho Chi Minh City 71307, Vietnam

<sup>2</sup> Faculty of Chemical and Food Technology, HCMC University of Technology and Education, Ho Chi Minh City 71307, Vietnam

<sup>3</sup> Department of Electrical, Electronics and Information Engineering, Nagaoka University of Technology, Nagaoka 940-2188, Japan

<sup>4</sup> Department of Science of Technology Innovation, Nagaoka University of Technology, Nagaoka 940-2188, Japan

<sup>5</sup> Department of Nuclear Technology, Nagaoka University of Technology, Nagaoka 940-2188, Japan

<sup>6</sup> Extreme Energy-Density Research Institute, Nagaoka University of Technology, Nagaoka 940-2188, Japan

---

\*phuoctv@hcmute.edu.vn

## Calculation of OH yield

To determine OH radical production, we first established a linear relationship between the concentration of 2hTA and its PL intensity under 310 nm excitation, as shown in Figure S1a. The result was:

$$[2hTA] = 1.5 \times 10^{-5} \times Intensity - 0.52$$

Using this calibration, the OH radical concentration in Samples (1)-(4) was calculated from their corresponding PL intensities. The net OH radical concentration from the H<sub>2</sub>O<sub>2</sub>-to-OH conversion by N-GQDs was then determined by subtracting the Samples (2) and (3) from the total OH concentration in Sample (1), as expressed by:

$$[OH]_{H_2O_2-to-OH\ conversion\ by\ N-GQDs} = [OH]_{Sample\ (1)} - [OH]_{Sample\ (2)} - [OH]_{Sample\ (3)}$$

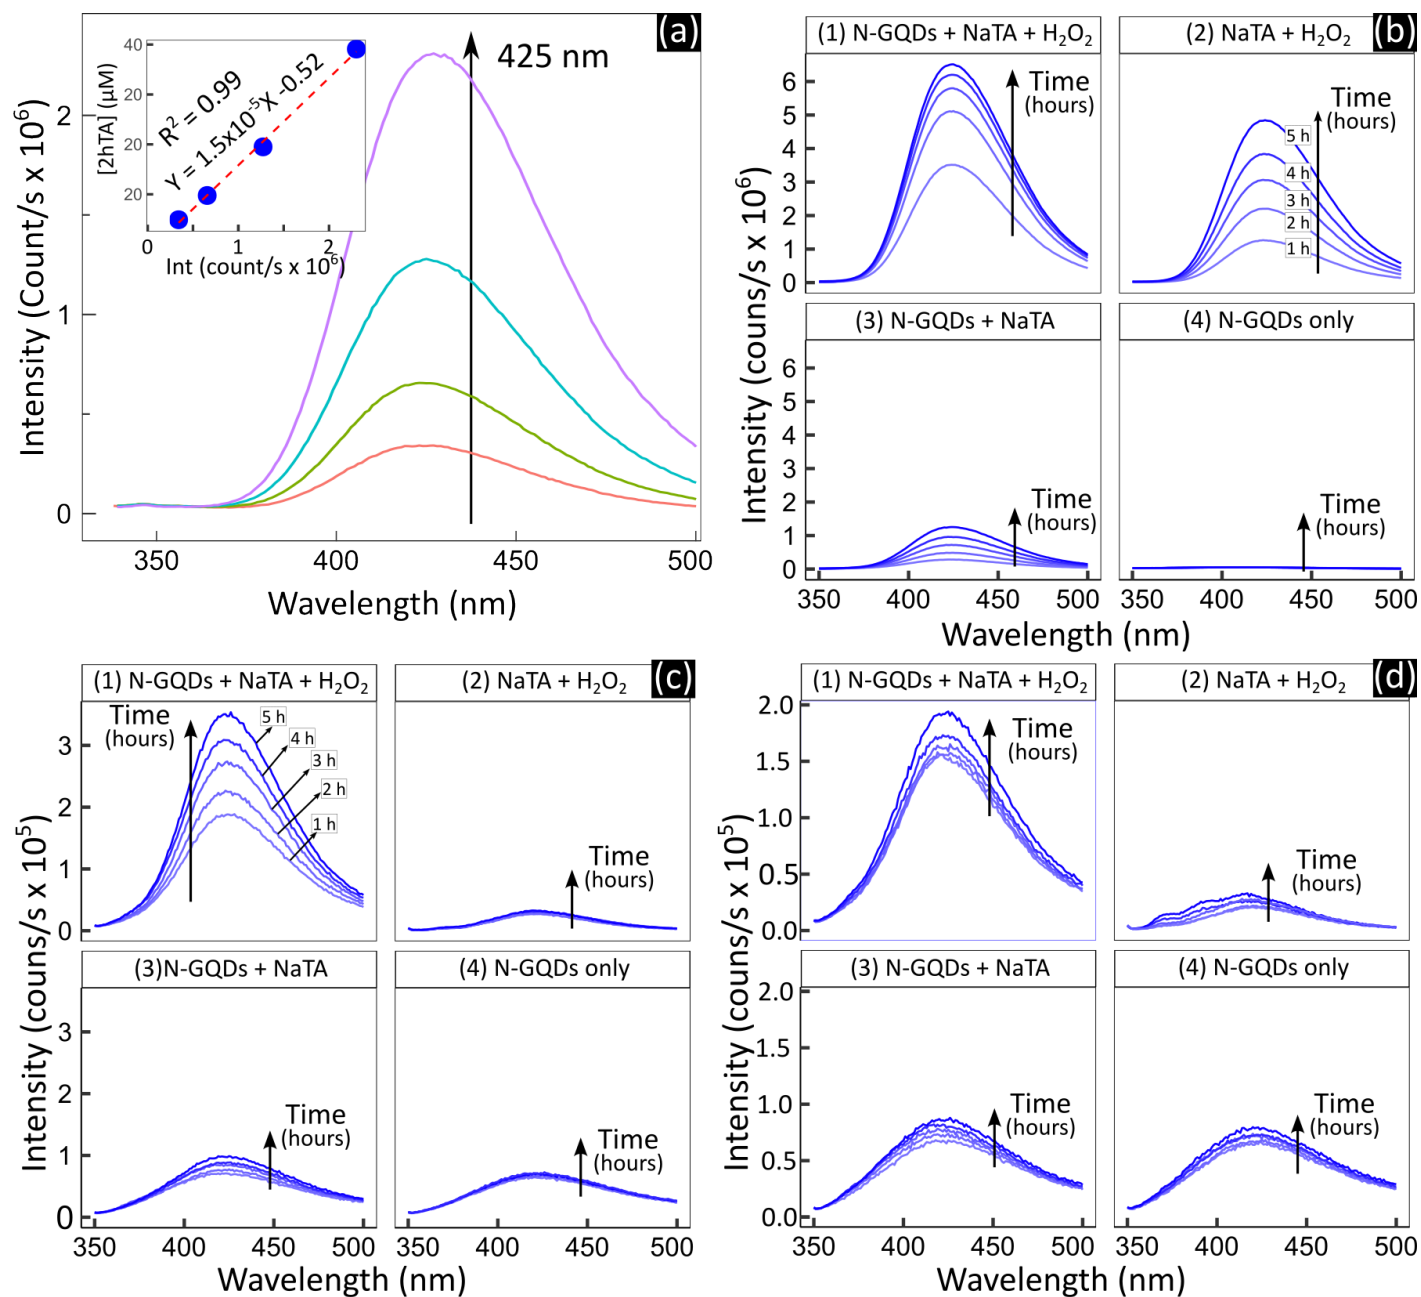

**Figure S 1** (a) PL spectra of 2-hydroxyterephthalic acid (2hTA) solutions at different concentrations, with inset showing the linear regression between 2hTA concentration and PL intensity. (b-d) Time evolution of PL spectra (excitation at 310 nm) of solutions under UVA, green, and red light irradiation, respectively.

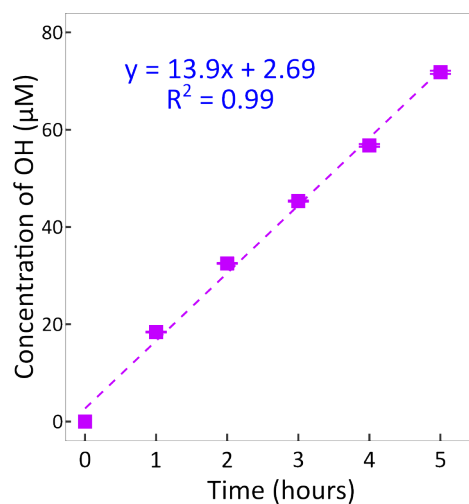

**Figure S 2** Time-evolution of OH radical concentration generated in solution of NaTA + H<sub>2</sub>O<sub>2</sub> under UVA illumination. The result was calculated from the PL spectra in Figure S1b. The concentration of OH radicals increases linearly with time, following the equation  $Y = 13.9X + 2.69$  ( $R^2 = 0.99$ ), indicating a steady generation rate of  $\sim 13.9 \mu\text{M}\cdot\text{h}^{-1}$ .

**Table S 1** Summary of the interpretation of N 1s and C 1s spectra of N-GQDs<sup>1-4</sup>.

| Peaks                                            | Core level binding energy (eV) | FWHM (eV) | G-L (0-1) |
|--------------------------------------------------|--------------------------------|-----------|-----------|
| <hr/> C <sub>1s</sub> <hr/>                      |                                |           |           |
| Graphitic carbon                                 | 284.3 - 284.8                  | 1.2 - 2.0 | 0 - 0.3   |
| C <sub>sp3</sub> -N in pyridinic, pyrrolic forms | 284.8 - 285.5                  | 1.2 - 2.0 | 0 - 0.3   |
| C-O, C <sub>sp3</sub> -N, C-OH                   | 285.6 - 286.5                  | 1.4 - 2.4 | 0 - 0.2   |
| Carbonyl (C=O)                                   | 286.5 - 288.0                  | 1.4 - 2.4 | 0 - 0.2   |
| Carboxyl (COOH)                                  | 288.0 - 289.2                  | 1.4 - 2.4 | 0 - 0.2   |
| Shake-up                                         | 291.0 - 294.0                  | 1.4 - 2.4 | 0 - 0.2   |
| <hr/> N <sub>1s</sub> <hr/>                      |                                |           |           |
| Pyridinic - N                                    | 397.8 - 398.8                  | 1.4 - 2.0 | 0 - 0.2   |
| Pyridone/C <sub>3</sub> N <sub>4</sub> /amine    | 399.6 - 399.9                  | 1.4 - 2.0 | 0 - 0.2   |
| Pyrrolic-N                                       | 399.9 - 400.7                  | 1.4 - 2.0 | 0 - 0.2   |
| Graphitic-N                                      | 401.2 - 401.8                  | 1.4 - 2.0 | 0 - 0.2   |
| Nitrogen oxide                                   | 402.2 - 404.2                  | 1.4 - 2.0 | 0 - 0.2   |

**Table S 2** The volume ratio of Staphylococcus aureus, N-GQDs, and H<sub>2</sub>O<sub>2</sub> in one mL sample. The H<sub>2</sub>O<sub>2</sub> stock solution was diluted and added to achieve final concentrations ranging from 10<sup>-1</sup> to 0.1 M as designed.

| Samples                                | SA density, N-GQDs, and H <sub>2</sub> O <sub>2</sub>                                                                         |
|----------------------------------------|-------------------------------------------------------------------------------------------------------------------------------|
| Control                                | 225 $\mu$ L SA 10 <sup>6</sup> CFU.mL <sup>-1</sup> + 775 $\mu$ L H <sub>2</sub> O                                            |
| N-GQDs control                         | 225 $\mu$ L SA 10 <sup>6</sup> CFU.mL <sup>-1</sup> + 775 $\mu$ L N-GQDs                                                      |
| H <sub>2</sub> O <sub>2</sub> alone    | 225 $\mu$ L SA 10 <sup>6</sup> CFU.mL <sup>-1</sup> + 770 $\mu$ L H <sub>2</sub> O + 25 $\mu$ L H <sub>2</sub> O <sub>2</sub> |
| N-GQDs + H <sub>2</sub> O <sub>2</sub> | 225 $\mu$ L SA 10 <sup>6</sup> CFU.mL <sup>-1</sup> + 770 $\mu$ L N-GQDs + 25 $\mu$ L H <sub>2</sub> O <sub>2</sub>           |

## References

- [1] Ayiania, M.; Smith, M.; Hensley, A. J.; Scudiero, L.; McEwen, J.-S.; Garcia-Perez, M. Deconvoluting the XPS spectra for nitrogen-doped chars: An analysis from first principles. *Carbon* **2020**, *162*, 528–544.
- [2] Al-Gaashani, R.; Najjar, A.; Zakaria, Y.; Mansour, S.; Atieh, M. XPS and structural studies of high quality graphene oxide and reduced graphene oxide prepared by different chemical oxidation methods. *Ceramics International* **2019**, *45*, 14439–14448.
- [3] Xiang, Q.; Yu, J.; Jaroniec, M. Preparation and enhanced visible-light photocatalytic H<sub>2</sub>-production activity of graphene/C<sub>3</sub>N<sub>4</sub> composites. *The Journal of Physical Chemistry C* **2011**, *115*, 7355–7363.
- [4] Thai, V.-P.; Tran, D. N.; Kosugi, K.; Takahashi, K.; Sasaki, T.; Kikuchi, T. One-Step Synthesis of N-Doped Graphene Quantum Dots via Plasma Contacting Liquid for Multiple Heavy Metal Ion Detection. *ACS Applied Nano Materials* **2024**, *7*, 12664–12672.
