# Supplementary figures and images for: Broad-spectrum light-responsive N-doped graphene quantum dots for efficient photocatalytic generation of hydroxyl radicals and antibacterial applications
Source: Royal Society of Chemistry journal article supplement (doi:10.1039/d5nr03717d), 2025-01-01

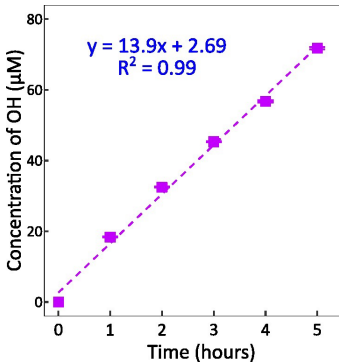

Supplement: d5nr03717d2.pdf [file d5nr03717d2.pdf]
